# Supplementary material
Source: Research Square preprint supplement (doi:10.21203/rs.3.rs-9456874/v1)
Supplement: Supplementary file 1 [file 3aa5c42f79cccd2b33469934.docx]

**Supplementary material**

**Meal-induced changes in cardiometabolic peptides in the context of acute cardiovascular diseases and glucose metabolism**

Lishkova G1,2,3, Schweizerhof O4,5, Großmann J1, von Rohr K1,3, Landmesser U2,4,6, Edelmann F2,6,7, Eckardt KU8, Endres M2,9,10,11,12, Weber JE2,4,9,10, Pischon T13,14, Schulz-Menger J2,6,7, Müller DN2,13,15, Spranger J7, Li L1,3,16, Mai K1,2,3,16,17*

on behalf of the BeLOVE Study Group

1. Department of Endocrinology and Metabolism, Charité-Universitätsmedizin Berlin, corporate member of the Freie Universität Berlin and Humboldt-Universität Berlin, ENDO-ERN, Berlin, Germany
2. German Centre for Cardiovascular Research (DZHK), Partner Site Berlin, Germany
3. German Center for Diabetes Research (DZD), München-Neuherberg, Germany
4. Berlin Institute of Health at Charité - Universitätsmedizin Berlin, Berlin, Germany
5. Institute of Biometry and Clinical Epidemiology, Charité-Universitätsmedizin Berlin, corporate member of the Freie Universität Berlin and Humboldt-Universität Berlin, Berlin, Germany
6. Deutsches Herzzentrum der Charité (DHZC), Department of Cardiology, Angiology and Intensive Care Medicine, Campus Virchow Klinikum, Berlin, Germany
7. Charité-Universitätsmedizin Berlin, corporate member of Freie Universität Berlin and

Humboldt-Universität zu Berlin, Berlin, Germany

1. Department of Nephrology and Medical Intensive Care, Charité-Universitätsmedizin Berlin, corporate member of the Freie Universität Berlin and Humboldt-Universität Berlin, Germany
2. Department of Neurology with experimental Neurology, Charité-Universitätsmedizin Berlin, corporate member of the Freie Universität Berlin and Humboldt-Universität Berlin, Berlin, Germany
3. Center for Stroke Research (CSB), Charité-Universitätsmedizin Berlin, corporate member of the Freie Universität Berlin and Humboldt-Universität Berlin, Berlin, Germany
4. German Center for Neurodegenerative Diseases (DZNE), partner site Berlin, Germany
5. German Center for Mental Health (DZPG), partner site Berlin, Germany
6. Max-Delbrück-Center for Molecular Medicine in the Helmholtz Association (MDC), Berlin, Germany
7. Biobank Technology Platform, Max Delbrück Center for Molecular Medicine in the Helmholtz Association (MDC), Berlin, Germany
8. Experimental and Clinical Research Center, a cooperation of Charité-Universitätsmedizin Berlin and Max Delbrück Center for Molecular Medicine, 13125 Berlin, Germany
9. Department of Human Nutrition, German Institute of Human Nutrition Potsdam-Rehbrücke, Nuthetal, Germany
10. Max Rubner Center for Cardiovascular Metabolic Renal Research, Charité-Universitätsmedizin Berlin, corporate member of the Freie Universität Berlin and Humboldt-Universität Berlin, Berlin, Germany

* Corresponding author: Prof. Knut Mai, MD

Charité – Universitätsmedizin Berlin

Department of Endocrinology and Metabolism,

Charitéplatz 1

10117 Berlin

Deutschland

E-Mail: knut.mai@charite.de

ORCID: 0000-0003-0126-3155

**Laboratory analysis - Measurement of insulin, MR-proANP, NT-proBNP, and Copeptin**

Serum insulin was measured using fluoroimmunometric assay (AutoDelfia; Perkin Elmer, Rodgau, Germany) (inter-assay coefficient of variation (CV) 2.3 - 3.5%, intra-assay CV 1.7 - 2.4%). Mid-region pro ANP was analyzed using a TRACE (time-resolved amplified cryptate emission) technology (BRAHMS MR-pro ANPKRYPTOR; BRAHMS ThermoFisher) (inter-assay CV ≤ 6.5%, intra-assay CV < 2.5%). NT-proBNP was analyzed by electrochemiluminescence immunoassay (ECLIA) on a Roche Cobas e601 platform (Roche Diagnostics) (inter-assay CV 1.7 - 3.1%, intra-assay CV 1.6 - 4.6%). Copeptin was measured with a TRACE technology (BRAHMS Copeptin proAVP KRYPTOR assay, Kryptor Compact Plus) (inter-assay CV < 18%, intra-assay CV < 15%). All assays were performed at Labor Berlin - Charité Vivantes GmbH according to manufacturer protocols. Measurements were done in a single batch on frozen samples (-80 °C) with internal quality controls within certified limits.

**Supplementary Figure legend**

**Supplementary Figure 1.** Conceptual SEM of direct and indirect associations between clinical condition (acute CV event, T2D, HOMA-IR) and postprandial peptide change.

**Supplementary Figure 2.** SEMs linking T2D to fasting and postprandial levels of (a) MR-proANP, (b) NT-proBNP and (c) copeptin: combined model.

**Supplementary Figure 3.** SEMs linking acute CV events to fasting and postprandial levels of (a) MR-proANP, (b) NT-proBNP and (c) Copeptin: subanalysis of stroke and ACS subgroups.

**Supplementary Figure 4.** SEMs linking T2D to fasting and postprandial levels of (a) MR-proANP, (b) NT-proBNP and (c) Copeptin: subanalysis of stroke and ACS subgroups.

**Supplementary Figure 5:** SEMs linking HOMA-IR to fasting and postprandial levels of (a) MR-proANP, (b) NT-proBNP and (c) Copeptin: subanalysis of stroke and ACS subgroups.

**Supplementary Figure 1**


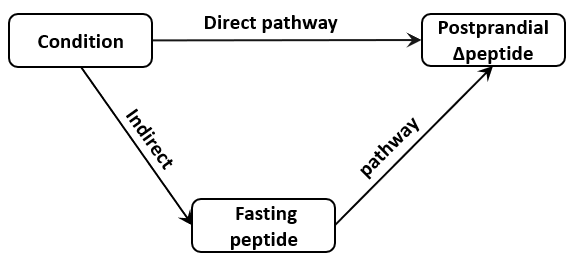


**Supplementary Figure 1.** Conceptual SEM of direct and indirect associations between clinical condition (acute CV event, T2D, HOMA-IR) and postprandial peptide change.

**Supplementary Figure 2**

**
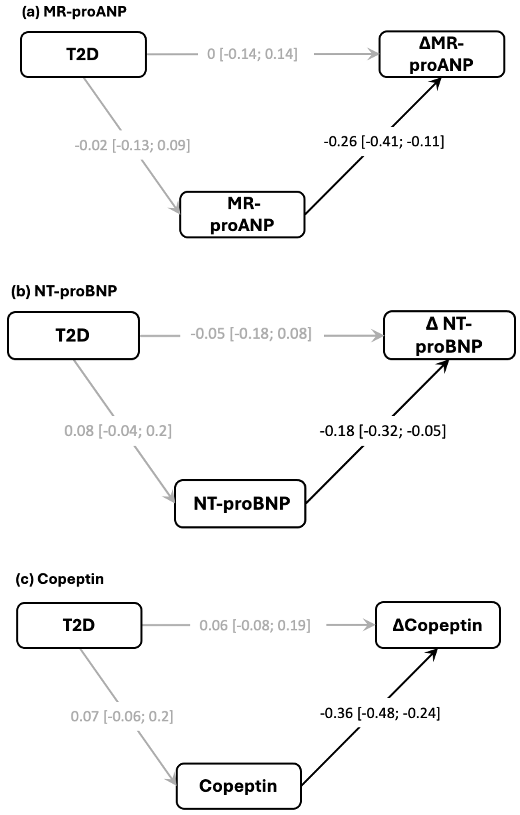
**

**Supplementary Figure 2.** SEMs linking T2D to fasting and postprandial levels of (a) MR-proANP, (b) NT-proBNP and (c) copeptin: combined model. Numbers at arrows indicate standardized regression coefficients with 95% CI. (a) n=189 without T2D vs. n=57 with T2D; R2=0.05 for ∆MR-proANP and R2=0.37 for fasting MR-proANP. (b) n=192 vs. n=57; R2=0.10 for ∆NT-proBNP and R2=0.26 for NT-proBNP. (c) n=180 vs. n=56; R2=0.13 for ∆copeptin and R2=0.16 for fasting copeptin. Fasting and postprandial levels were adjusted for age, sex and BMI. Full models, including unstandardized regression coefficients, are shown in Supplementary Tables 4a-c.

**Supplementary Figure 3**

**
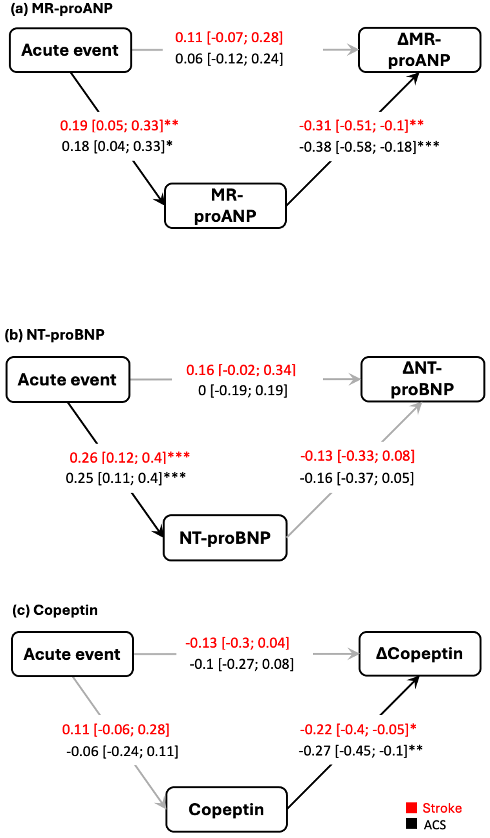
**

**Supplementary Figure 3.** SEMs linking acute CV events to fasting and postprandial levels of (a) MR-proANP, (b) NT-proBNP and (c) Copeptin: subanalysis of stroke and ACS subgroups. Numbers at arrows indicate standardized regression coefficients with 95% CI. Fasting and postprandial levels were adjusted for age, sex and BMI. Full models, including unstandardized regression coefficients, are shown in Supplementary Table 2 (stroke) and Supplementary Table 3 (ACS).

**Supplementary Figure 4**


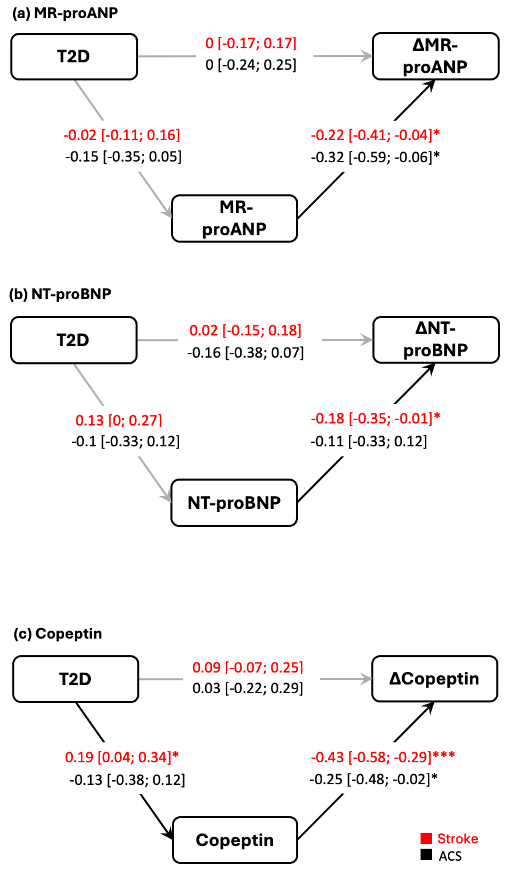


**Supplementary Figure 4.** SEMs linking T2D to fasting and postprandial levels of (a) MR-proANP, (b) NT-proBNP and (c) Copeptin: subanalysis of stroke and ACS subgroups. Numbers at arrows indicate standardized regression coefficients with 95% CI. Fasting and postprandial levels were adjusted for age, sex and BMI. Full models, including unstandardized regression coefficients, are shown in Supplementary Table 5 (stroke) and Supplementary Table 6 (ACS).

**Supplementary Figure 5**


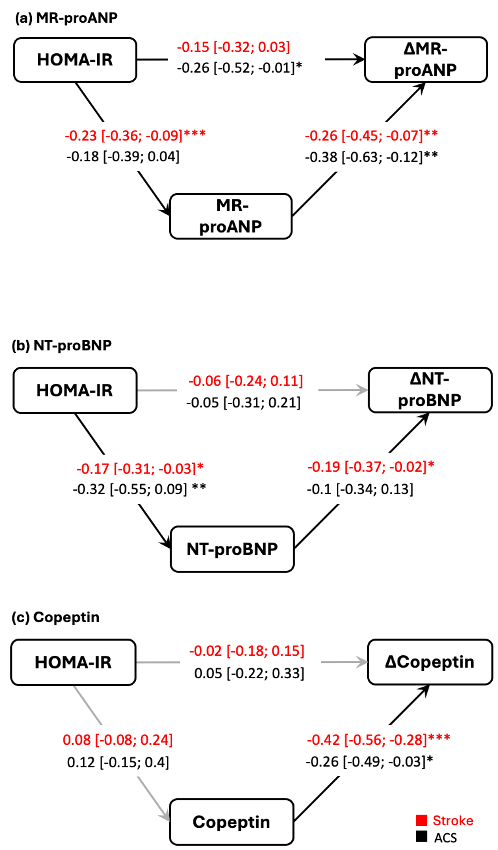


**Supplementary Figure 5.** SEMs linking HOMA-IR to fasting and postprandial levels of (a) MR-proANP, (b) NT-proBNP and (c) Copeptin: subanalysis of stroke and ACS subgroups. Numbers at arrows indicate standardized regression coefficients with 95% CI. Fasting and postprandial levels were adjusted for age, sex and BMI. Full models, including unstandardized regression coefficients, are shown in Supplementary Table 8 (stroke) and Supplementary Table 9 (ACS).

**Supplementary Table Legend**

**Supplementary Table 1a:** SEM results for CV events – Combined model for MR-proANP. Explained variance R2=0.11 for ∆MR-proANP and R2=0.43 for MR-proANP.

**Supplementary Table 1b:** SEM results for CV events – Combined model for NT-proBNP.

**Supplementary Table 1c:** SEM results for CV events – Combined model for Copeptin.

**Supplementary Table 1d:** SEM results for CV events (sensitivity analysis with adjustment for AF and GFR) – Combined model for MR-proANP.

**Supplementary Table 1e:** SEM results for CV events (sensitivity analysis with adjustment for AF and GFR) – Combined model for NT-proBNP.

**Supplementary Table 1f:** SEM results for CV events (sensitivity analysis with adjustment for AF and GFR) – Combined model for Copeptin.

**Supplementary Table 2a:** SEM results for CV events – Stroke Subanalysis for MR-proANP.

**Supplementary Table 2b:** SEM results for CV events – Stroke Subanalysis for NT-proBNP.

**Supplementary Table 2c:** SEM results for CV events – Stroke Subanalysis for Copeptin.

**Supplementary Table 3a:** SEM results for CV events – ACS Subanalysis for MR-proANP.

**Supplementary Table 3b:** SEM results for CV events – ACS Subanalysis for NT-proBNP.

**Supplementary Table 3c:** SEM results for CV events – ACS Subanalysis for Copeptin.

**Supplementary Table 4a:** SEM results for T2D – Combined model for MR-proANP.

**Supplementary Table 4b:** SEM results for T2D – Combined model for NT-proBNP.

**Supplementary Table 4c:** SEM results for T2D – Combined model for Copeptin.

**Supplementary Table 4d:** SEM results for T2D (sensitivity analysis with adjustment for AF and GFR) – Combined model for MR-proANP.

**Supplementary Table 4e:** SEM results for T2D (sensitivity analysis with adjustment for AF and GFR) – Combined model for NT-proBNP.

**Supplementary Table 4f:** SEM results for T2D (sensitivity analysis with adjustment for AF and GFR) – Combined model for Copeptin.

**Supplementary Table 5a:** SEM results for T2D – Stroke Subanalysis for MR-proANP.

**Supplementary Table 5b:** SEM results for T2D – Stroke Subanalysis for NT-proBNP.

**Supplementary Table 5c:** SEM results for T2D – Stroke Subanalysis for Copeptin.

**Supplementary Table 6a:** SEM results for T2D – ACS Subanalysis for MR-proANP.

**Supplementary Table 6b:** SEM results for T2D – ACS Subanalysis for NT-proBNP.

**Supplementary Table 6c:** SEM results for T2D – ACS Subanalysis for Copeptin.

**Supplementary Table 7a:** SEM results for HOMA-IR – Combined model for MR-proANP.

**Supplementary Table 7b:** SEM results for HOMA-IR – Combined model for NT-proBNP.

**Supplementary Table 7c:** SEM results for HOMA-IR – Combined model for Copeptin.

**Supplementary Table 7d:** SEM results for HOMA-IR (sensitivity analysis with adjustment for AF and GFR) – Combined model for MR-proANP.

**Supplementary Table 7e:** SEM results for HOMA-IR (sensitivity analysis with adjustment for AF and GFR) – Combined model for NT-proBNP.

**Supplementary Table 7f:** SEM results for HOMA-IR (sensitivity analysis with adjustment for AF and GFR) – Combined model for Copeptin.

**Supplementary Table 8a:** SEM results for HOMA-IR – Stroke Subanalysis for MR-proANP.

**Supplementary Table 8b:** SEM results for HOMA-IR – Stroke Subanalysis for NT-proBNP.

**Supplementary Table 8c:** SEM results for HOMA-IR – Stroke Subanalysis for Copeptin.

**Supplementary Table 9a:** SEM results for HOMA-IR – ACS Subanalysis for MR-proANP.

**Supplementary Table 9b:** SEM results for HOMA-IR – ACS Subanalysis for NT-proBNP.

**Supplementary Table 9c:** SEM results for HOMA-IR – ACS Subanalysis for Copeptin.

**Supplementary Table 1a**

**Supplementary Table 1a.** SEM results for CV events – Combined model for MR-proANP. Explained variance R2=0.11 for ∆MR-proANP and R2=0.43 for MR-proANP. MR-proANP refers to the natural log-transformed fasting peptide concentration. ∆MR-proANP refers to the change in log-transformed concentrations (ln(postprandial) - ln(fasting)).

| **Outcome** | **Predictor** | ***SE*** | ***Z*** | ***p*** | ***b*** | **95% CI (*b*)** | ***b**** | **95% CI (*b**)** |
| --- | --- | --- | --- | --- | --- | --- | --- | --- |
| ∆MR-proANP | MR-proANP | 0.02 | -3.11 | .002** | -0.06 | [-0.10, -0.02] | -0.31 | [-0.50, -0.12] |
| ∆MR-proANP | CV event | 0.02 | 1.04 | .299 | 0.02 | [-0.02, 0.07] | 0.09 | [-0.08, 0.25] |
| ∆MR-proANP | age | 0.01 | -0.03 | .977 | -0.00 | [-0.02, 0.02] | -0.00 | [-0.20, 0.19] |
| ∆MR-proANP | sex | 0.02 | 0.69 | .493 | 0.02 | [-0.03, 0.06] | 0.06 | [-0.10, 0.21] |
| ∆MR-proANP | BMI | 0.00 | -2.49 | .013* | -0.00 | [-0.01, -0.00] | -0.20 | [-0.36, -0.05] |
| MR-proANP | CV event | 0.09 | 3.31 | .001*** | 0.31 | [0.13, 0.49] | 0.22 | [0.09, 0.34] |
| MR-proANP | age | 0.04 | 8.20 | < .001*** | 0.34 | [0.26, 0.43] | 0.55 | [0.44, 0.66] |
| MR-proANP | sex | 0.10 | -1.93 | .054 | -0.18 | [-0.37, 0.00] | -0.12 | [-0.25, 0.00] |
| MR-proANP | BMI | 0.01 | 0.88 | .377 | 0.01 | [-0.01, 0.02] | 0.06 | [-0.07, 0.19] |

**Supplementary Table 1b**

**Supplementary Table 1b.** SEM results for CV events – Combined model for NT-proBNP. Explained variance R2=0.07 for ∆NT-proBNP and R2=0.36 for NT-proBNP. *NT-proBNP* refers to the natural log-transformed fasting peptide concentration. *∆NT-proBNP* refers to the change in log-transformed concentrations (ln(postprandial) - ln(fasting)).

| **Outcome** | **Predictor** | ***SE*** | ***Z*** | ***p*** | ***b*** | **95% CI (b)** | **b*** | **95% CI (b*)** |
| --- | --- | --- | --- | --- | --- | --- | --- | --- |
| ∆NT-proBNP | NT-proBNP | 0.01 | -1.63 | .102 | -0.02 | [-0.03, 0.00] | -0.16 | [-0.35, 0.03] |
| ∆NT-proBNP | CV_event | 0.02 | 1.01 | .314 | 0.03 | [-0.02, 0.07] | 0.09 | [-0.08, 0.26] |
| ∆NT-proBNP | age | 0.01 | 3.09 | .002** | 0.04 | [0.01, 0.06] | 0.29 | [0.12, 0.47] |
| ∆NT-proBNP | sex | 0.02 | -0.93 | .355 | -0.02 | [-0.07, 0.03] | -0.08 | [-0.23, 0.08] |
| ∆NT-proBNP | BMI | 0.00 | 1.40 | .161 | 0.00 | [-0.00, 0.01] | 0.12 | [-0.04, 0.28] |
| NT-proBNP | CV_event | 0.20 | 4.10 | < .001*** | 0.80 | [0.42, 1.19] | 0.28 | [0.15, 0.41] |
| NT-proBNP | age | 0.09 | 6.23 | < .001*** | 0.55 | [0.38, 0.72] | 0.44 | [0.32, 0.56] |
| NT-proBNP | sex | 0.20 | -1.03 | .302 | -0.21 | [-0.60, 0.19] | -0.07 | [-0.20, 0.06] |
| NT-proBNP | BMI | 0.01 | 0.15 | .879 | 0.00 | [-0.03, 0.03] | 0.01 | [-0.12, 0.15] |

**Supplementary Table 1c**

**Supplementary Table 1c.** SEM results for CV events – Combined model for Copeptin. Explained variance R2=0.16 for ∆Copeptin and R2=0.15 for Copeptin. *Copeptin* refers to the natural log-transformed fasting peptide concentration. *∆Copeptin* refers to the change in log-transformed concentrations (ln(postprandial) - ln(fasting)).

| **Outcome** | **Predictor** | ***SE*** | ***Z*** | ***p*** | ***b*** | **95% CI (b)** | **b*** | **95% CI (b*)** |
| --- | --- | --- | --- | --- | --- | --- | --- | --- |
| ∆Copeptin | Copeptin | 0.04 | -3.26 | .001** | -0.13 | [-0.21, -0.05] | -0.27 | [-0.42, -0.11] |
| ∆Copeptin | CV_event | 0.06 | -1.64 | .101 | -0.09 | [-0.20, 0.02] | -0.13 | [-0.29, 0.02] |
| ∆Copeptin | age | 0.03 | 2.51 | .012* | 0.06 | [0.01, 0.11] | 0.21 | [0.05, 0.37] |
| ∆Copeptin | sex | 0.06 | 1.22 | .222 | 0.07 | [-0.04, 0.19] | 0.10 | [-0.06, 0.27] |
| ∆Copeptin | BMI | 0.00 | 1.89 | .059 | 0.01 | [-0.00, 0.02] | 0.16 | [-0.00, 0.32] |
| Copeptin | CV_event | 0.11 | 0.53 | .597 | 0.06 | [-0.16, 0.28] | 0.04 | [-0.12, 0.20] |
| Copeptin | age | 0.05 | 1.99 | .047* | 0.10 | [0.00, 0.20] | 0.16 | [0.00, 0.32] |
| Copeptin | sex | 0.12 | -4.40 | < .001*** | -0.52 | [-0.75, -0.29] | -0.35 | [-0.49, -0.21] |
| Copeptin | BMI | 0.01 | 2.44 | .015* | 0.02 | [0.00, 0.04] | 0.20 | [0.04, 0.35] |

**Supplementary Table 1d**

**Supplementary Table 1d.** SEM results for CV events (sensitivity analysis with adjustment for AF and GFR) – Combined model for MR-proANP. Explained variance R2=0.11 for ∆MR-proANP and R2=0.57 for MR-proANP. MR-proANP refers to the natural log-transformed fasting peptide concentration. ∆MR-proANP refers to the change in log-transformed concentrations (ln(postprandial) - ln(fasting)).

| **Outcome** | **Predictor** | ***SE*** | ***Z*** | ***p*** | ***b*** | **95% CI (b)** | ***b**** | **95% CI (b*)** |
| --- | --- | --- | --- | --- | --- | --- | --- | --- |
| ∆MR-proANP | MR-proANP | 0.02 | -2.69 | .007** | -0.06 | [-0.11, -0.02] | -0.31 | [-0.53, -0.09] |
| ∆MR-proANP | CV event | 0.02 | 1.06 | .291 | 0.03 | [-0.02, 0.07] | 0.09 | [-0.08, 0.26] |
| ∆MR-proANP | age | 0.01 | 0.18 | .855 | 0.00 | [-0.02, 0.03] | 0.02 | [-0.19, 0.23] |
| ∆MR-proANP | sex | 0.02 | 0.82 | .410 | 0.02 | [-0.03, 0.07] | 0.07 | [-0.09, 0.23] |
| ∆MR-proANP | BMI | 0.00 | -2.47 | .013* | -0.00 | [-0.01, -0.00] | -0.20 | [-0.36, -0.05] |
| ∆MR-proANP | GFR | 0.00 | 0.59 | .558 | 0.00 | [-0.00, 0.00] | 0.06 | [-0.14, 0.25] |
| ∆MR-proANP | AF | 0.03 | -0.52 | .605 | -0.01 | [-0.07, 0.04] | -0.04 | [-0.21, 0.12] |
| MR-proANP | CV event | 0.08 | 3.83 | < .001*** | 0.31 | [0.15, 0.47] | 0.22 | [0.11, 0.33] |
| MR-proANP | age | 0.04 | 4.54 | < .001*** | 0.20 | [0.11, 0.28] | 0.31 | [0.18, 0.44] |
| MR-proANP | sex | 0.08 | -1.74 | .081 | -0.15 | [-0.31, 0.02] | -0.10 | [-0.21, 0.01] |
| MR-proANP | BMI | 0.01 | 0.34 | .734 | 0.00 | [-0.01, 0.01] | 0.02 | [-0.09, 0.13] |
| MR-proANP | GFR | 0.00 | -4.59 | < .001*** | -0.01 | [-0.01, -0.01] | -0.30 | [-0.42, -0.17] |
| MR-proANP | AF | 0.09 | -5.03 | < .001*** | -0.47 | [-0.65, -0.29] | -0.28 | [-0.38, -0.17] |

**Supplementary Table 1e**

**Supplementary Table 1e.** SEM results for CV events (sensitivity analysis with adjustment for AF and GFR) – Combined model for NT-proBNP. Explained variance R2=0.08 for ∆NT-proBNP and R2=0.49 for NT-proBNP. *NT-proBNP* refers to the natural log-transformed fasting peptide concentration. *∆NT-proBNP* refers to the change in log-transformed concentrations (ln(postprandial) - ln(fasting)).

| **Outcome** | **Predictor** | ***SE*** | ***Z*** | ***p*** | ***b*** | **95% CI (b)** | ***b**** | **95% CI (b*)** |
| --- | --- | --- | --- | --- | --- | --- | --- | --- |
| ∆NT-proBNP | NT-proBNP | 0.01 | -0.95 | .344 | -0.01 | [-0.03, 0.01] | -0.10 | [-0.31, 0.11] |
| ∆NT-proBNP | CV event | 0.03 | 0.80 | .424 | 0.02 | [-0.03, 0.07] | 0.07 | [-0.10, 0.24] |
| ∆NT-proBNP | age | 0.01 | 3.01 | .003** | 0.04 | [0.01, 0.07] | 0.32 | [0.12, 0.52] |
| ∆NT-proBNP | sex | 0.02 | -1.03 | .305 | -0.03 | [-0.07, 0.02] | -0.08 | [-0.24, 0.08] |
| ∆NT-proBNP | BMI | 0.00 | 1.50 | .133 | 0.00 | [-0.00, 0.01] | 0.12 | [-0.04, 0.29] |
| ∆NT-proBNP | GFR | 0.00 | 0.46 | .649 | 0.00 | [-0.00, 0.00] | 0.04 | [-0.14, 0.23] |
| ∆NT-proBNP | AF | 0.03 | 1.09 | .277 | 0.03 | [-0.03, 0.09] | 0.10 | [-0.08, 0.27] |
| NT-proBNP | CV event | 0.18 | 4.65 | < .001*** | 0.82 | [0.47, 1.16] | 0.29 | [0.17, 0.41] |
| NT-proBNP | age | 0.09 | 3.68 | < .001*** | 0.35 | [0.16, 0.53] | 0.28 | [0.13, 0.42] |
| NT-proBNP | sex | 0.18 | -0.38 | .701 | -0.07 | [-0.43, 0.29] | -0.02 | [-0.14, 0.10] |
| NT-proBNP | BMI | 0.01 | -0.32 | .749 | -0.00 | [-0.03, 0.02] | -0.02 | [-0.14, 0.10] |
| NT-proBNP | GFR | 0.00 | -2.06 | .040* | -0.01 | [-0.02, -0.00] | -0.15 | [-0.28, -0.01] |
| NT-proBNP | AF | 0.20 | -5.49 | < .001*** | -1.11 | [-1.51, -0.72] | -0.33 | [-0.44, -0.22] |

**Supplementary Table 1f**

**Supplementary Table 1f.** SEM results for CV events (sensitivity analysis with adjustment for AF and GFR) – Combined model for Copeptin. Explained variance R2=0.16 for ∆Copeptin and R2=0.25 for Copeptin. *Copeptin* refers to the natural log-transformed fasting peptide concentration. *∆Copeptin* refers to the change in log-transformed concentrations (ln(postprandial) - ln(fasting)).

| **Outcome** | **Predictor** | **SE** | **Z** | **p** | **b** | **95% CI (b)** | **b*** | **95% CI (b*)** |
| --- | --- | --- | --- | --- | --- | --- | --- | --- |
| ∆Copeptin | Copeptin | 0.04 | -3.35 | .001*** | -0.14 | [-0.22, -0.06] | -0.29 | [-0.46, -0.13] |
| ∆Copeptin | CV event | 0.06 | -1.66 | .098 | -0.09 | [-0.20, 0.02] | -0.13 | [-0.29, 0.02] |
| ∆Copeptin | age | 0.03 | 1.69 | .092 | 0.05 | [-0.01, 0.11] | 0.17 | [-0.02, 0.36] |
| ∆Copeptin | sex | 0.06 | 1.00 | .320 | 0.06 | [-0.06, 0.18] | 0.09 | [-0.08, 0.25] |
| ∆Copeptin | BMI | 0.00 | 1.88 | .060 | 0.01 | [-0.00, 0.02] | 0.15 | [-0.00, 0.31] |
| ∆Copeptin | GFR | 0.00 | -0.90 | .368 | -0.00 | [-0.00, 0.00] | -0.09 | [-0.27, 0.10] |
| ∆Copeptin | AF | 0.06 | 0.04 | .972 | 0.00 | [-0.12, 0.13] | 0.00 | [-0.15, 0.16] |
| Copeptin | CV event | 0.11 | 0.51 | .608 | 0.06 | [-0.16, 0.27] | 0.04 | [-0.11, 0.19] |
| Copeptin | age | 0.06 | -0.67 | .502 | -0.04 | [-0.15, 0.07] | -0.06 | [-0.24, 0.12] |
| Copeptin | sex | 0.11 | -4.71 | < .001*** | -0.53 | [-0.75, -0.31] | -0.36 | [-0.49, -0.22] |
| Copeptin | BMI | 0.01 | 2.20 | .028* | 0.02 | [0.00, 0.03] | 0.17 | [0.02, 0.32] |
| Copeptin | GFR | 0.00 | -4.04 | < .001*** | -0.01 | [-0.02, -0.01] | -0.35 | [-0.51, -0.19] |
| Copeptin | AF | 0.12 | -1.65 | .100 | -0.20 | [-0.44, 0.04] | -0.12 | [-0.27, 0.02] |

**Supplementary Table 2a**

**Supplementary Table 2a.** SEM results for CV events – Stroke Subanalysis for MR-proANP. Explained variance R2=0.12 for ∆MR-proANP and R2=0.40 for MR-proANP. *MR-proANP* refers to the natural log-transformed fasting peptide concentration. *∆MR-proANP* refers to the change in log-transformed concentrations (ln(postprandial) - ln(fasting)).

| **Outcome** | **Predictor** | ***SE*** | ***Z*** | ***p*** | ***b*** | **95% CI (b)** | **b*** | **95% CI (b*)** |
| --- | --- | --- | --- | --- | --- | --- | --- | --- |
| ∆MR-proANP | MR-proANP | 0.02 | -2.88 | .004** | -0.06 | [-0.10, -0.02] | -0.31 | [-0.51, -0.10] |
| ∆MR-proANP | CV event | 0.03 | 1.18 | .240 | 0.03 | [-0.02, 0.09] | 0.11 | [-0.07, 0.28] |
| ∆MR-proANP | age | 0.01 | -0.43 | .669 | -0.01 | [-0.03, 0.02] | -0.05 | [-0.26, 0.16] |
| ∆MR-proANP | sex | 0.02 | 0.40 | .690 | 0.01 | [-0.04, 0.06] | 0.03 | [-0.13, 0.20] |
| ∆MR-proANP | BMI | 0.00 | -2.54 | .011* | -0.00 | [-0.01, -0.00] | -0.22 | [-0.39, -0.06] |
| MR-proANP | CV event | 0.12 | 2.58 | .010** | 0.30 | [0.07, 0.53] | 0.19 | [0.05, 0.33] |
| MR-proANP | age | 0.05 | 7.29 | < .001*** | 0.35 | [0.26, 0.45] | 0.55 | [0.42, 0.67] |
| MR-proANP | sex | 0.10 | -1.51 | .131 | -0.16 | [-0.36, 0.05] | -0.11 | [-0.24, 0.03] |
| MR-proANP | BMI | 0.01 | 0.42 | .677 | 0.00 | [-0.01, 0.02] | 0.03 | [-0.11, 0.17] |

**Supplementary Table 2b**

**Supplementary Table 2b.** SEM results for CV events – Stroke Subanalysis for NT-proBNP. Explained variance R2=0.07 for ∆NT-proBNP and R2=0.34 for NT-proBNP. *NT-proBNP* refers to the natural log-transformed fasting peptide concentration. *∆NT-proBNP* refers to the change in log-transformed concentrations (ln(postprandial) - ln(fasting)).

| **Outcome** | **Predictor** | ***SE*** | ***Z*** | ***p*** | ***b*** | **95% CI (b)** | **b*** | **95% CI (b*)** |
| --- | --- | --- | --- | --- | --- | --- | --- | --- |
| ∆NT-proBNP | NT-proBNP | 0.01 | -1.22 | .221 | -0.01 | [-0.03, 0.01] | -0.13 | [-0.33, 0.08] |
| ∆NT-proBNP | CV_event | 0.03 | 1.72 | .086 | 0.05 | [-0.01, 0.11] | 0.16 | [-0.02, 0.34] |
| ∆NT-proBNP | age | 0.01 | 2.05 | .040* | 0.03 | [0.00, 0.05] | 0.21 | [0.01, 0.41] |
| ∆NT-proBNP | sex | 0.03 | -0.81 | .416 | -0.02 | [-0.07, 0.03] | -0.07 | [-0.24, 0.10] |
| ∆NT-proBNP | BMI | 0.00 | 1.26 | .206 | 0.00 | [-0.00, 0.01] | 0.11 | [-0.06, 0.29] |
| NT-proBNP | CV_event | 0.23 | 3.41 | .001*** | 0.80 | [0.34, 1.26] | 0.26 | [0.12, 0.40] |
| NT-proBNP | age | 0.10 | 5.51 | < .001*** | 0.53 | [0.34, 0.72] | 0.43 | [0.30, 0.57] |
| NT-proBNP | sex | 0.21 | -0.52 | .601 | -0.11 | [-0.51, 0.30] | -0.04 | [-0.18, 0.11] |
| NT-proBNP | BMI | 0.02 | -0.28 | .777 | -0.00 | [-0.04, 0.03] | -0.02 | [-0.17, 0.13] |

**Supplementary Table 2c**

**Supplementary Table 2c.** SEM results for CV events – Stroke Subanalysis for Copeptin. Explained variance R2=0.13 for ∆Copeptin and R2=0.18 for Copeptin. *Copeptin* refers to the natural log-transformed fasting peptide concentration. *∆Copeptin* refers to the change in log-transformed concentrations (ln(postprandial) - ln(fasting)).

| **Outcome** | **Predictor** | ***SE*** | ***Z*** | ***p*** | ***b*** | **95% CI (b)** | **b*** | **95% CI (b*)** |
| --- | --- | --- | --- | --- | --- | --- | --- | --- |
| ∆Copeptin | Copeptin | 0.05 | -2.43 | .015* | -0.11 | [-0.20, -0.02] | -0.22 | [-0.40, -0.05] |
| ∆Copeptin | CV_event | 0.07 | -1.46 | .144 | -0.10 | [-0.24, 0.03] | -0.13 | [-0.30, 0.04] |
| ∆Copeptin | age | 0.03 | 2.12 | .034* | 0.06 | [0.00, 0.12] | 0.20 | [0.02, 0.38] |
| ∆Copeptin | sex | 0.07 | 1.08 | .282 | 0.07 | [-0.06, 0.20] | 0.10 | [-0.08, 0.28] |
| ∆Copeptin | BMI | 0.00 | 1.43 | .152 | 0.01 | [-0.00, 0.02] | 0.13 | [-0.05, 0.30] |
| Copeptin | CV_event | 0.13 | 1.25 | .213 | 0.17 | [-0.10, 0.43] | 0.11 | [-0.06, 0.28] |
| Copeptin | age | 0.06 | 2.03 | .043* | 0.11 | [0.00, 0.22] | 0.18 | [0.01, 0.35] |
| Copeptin | sex | 0.12 | -4.36 | < .001*** | -0.52 | [-0.76, -0.29] | -0.37 | [-0.52, -0.22] |
| Copeptin | BMI | 0.01 | 1.92 | .055 | 0.02 | [-0.00, 0.04] | 0.17 | [-0.00, 0.33] |

**Supplementary Table 3a**

**Supplementary Table 3a.** SEM results for CV events – ACS Subanalysis for MR-proANP. Explained variance R2=0.16 for ∆MR-proANP and R2=0.41 for MR-proANP. *MR-proANP* refers to the natural log-transformed fasting peptide concentration. *∆MR-proANP* refers to the change in log-transformed concentrations (ln(postprandial) - ln(fasting)).

| **Outcome** | **Predictor** | ***SE*** | ***Z*** | ***p*** | ***b*** | **95% CI (b)** | **b*** | **95% CI (b*)** |
| --- | --- | --- | --- | --- | --- | --- | --- | --- |
| ∆MR-proANP | MR-proANP | 0.02 | -3.51 | < .001*** | -0.08 | [-0.12, -0.03] | -0.38 | [-0.58, -0.18] |
| ∆MR-proANP | CV event | 0.03 | 0.66 | .511 | 0.02 | [-0.04, 0.08] | 0.06 | [-0.12, 0.24] |
| ∆MR-proANP | age | 0.01 | 0.37 | .714 | 0.01 | [-0.02, 0.03] | 0.04 | [-0.17, 0.25] |
| ∆MR-proANP | sex | 0.03 | 0.76 | .447 | 0.02 | [-0.03, 0.07] | 0.07 | [-0.11, 0.24] |
| ∆MR-proANP | BMI | 0.00 | -2.73 | .006** | -0.01 | [-0.01, -0.00] | -0.24 | [-0.41, -0.08] |
| MR-proANP | CV event | 0.12 | 2.50 | .012* | 0.31 | [0.07, 0.55] | 0.18 | [0.04, 0.33] |
| MR-proANP | age | 0.05 | 7.82 | < .001*** | 0.36 | [0.27, 0.45] | 0.58 | [0.46, 0.69] |
| MR-proANP | sex | 0.11 | -1.13 | .260 | -0.12 | [-0.34, 0.09] | -0.08 | [-0.23, 0.06] |
| MR-proANP | BMI | 0.01 | 0.53 | .593 | 0.00 | [-0.01, 0.02] | 0.04 | [-0.11, 0.19] |

**Supplementary Table 3b**

**Supplementary Table 3b.** SEM results for CV events – ACS Subanalysis for NT-proBNP. Explained variance R2=0.05 for ∆NT-proBNP and R2=0.34 for NT-proBNP. *NT-proBNP* refers to the natural log-transformed fasting peptide concentration. *∆NT-proBNP* refers to the change in log-transformed concentrations (ln(postprandial) - ln(fasting)).

| **Outcome** | **Predictor** | ***SE*** | ***Z*** | ***p*** | ***b*** | **95% CI (b)** | **b*** | **95% CI (b*)** |
| --- | --- | --- | --- | --- | --- | --- | --- | --- |
| ∆NT-proBNP | NT-proBNP | 0.01 | -1.46 | .143 | -0.02 | [-0.04, 0.01] | -0.16 | [-0.37, 0.05] |
| ∆NT-proBNP | CV_event | 0.03 | 0.02 | .987 | 0.00 | [-0.06, 0.07] | 0.00 | [-0.19, 0.19] |
| ∆NT-proBNP | age | 0.01 | 2.50 | .012* | 0.03 | [0.01, 0.06] | 0.27 | [0.07, 0.47] |
| ∆NT-proBNP | sex | 0.03 | -0.19 | .846 | -0.01 | [-0.06, 0.05] | -0.02 | [-0.20, 0.17] |
| ∆NT-proBNP | BMI | 0.00 | 0.62 | .536 | 0.00 | [-0.00, 0.01] | 0.06 | [-0.13, 0.24] |
| NT-proBNP | CV_event | 0.26 | 3.26 | .001** | 0.85 | [0.34, 1.36] | 0.25 | [0.11, 0.40] |
| NT-proBNP | age | 0.10 | 6.20 | < .001*** | 0.59 | [0.41, 0.78] | 0.48 | [0.35, 0.61] |
| NT-proBNP | sex | 0.23 | -0.32 | .750 | -0.07 | [-0.52, 0.37] | -0.02 | [-0.18, 0.13] |
| NT-proBNP | BMI | 0.02 | 0.19 | .851 | 0.00 | [-0.03, 0.03] | 0.01 | [-0.14, 0.17] |

**Supplementary Table 3c**

**Supplementary Table 3c.** SEM results for CV events – ACS Subanalysis for Copeptin. Explained variance R2=0.17 for ∆Copeptin and R2=0.14 for Copeptin. *Copeptin* refers to the natural log-transformed fasting peptide concentration. *∆Copeptin* refers to the change in log-transformed concentrations (ln(postprandial) - ln(fasting)).

| **Outcome** | **Predictor** | ***SE*** | ***Z*** | ***p*** | ***b*** | **95% CI (b)** | ***b**** | **95% CI (b*)** |
| --- | --- | --- | --- | --- | --- | --- | --- | --- |
| ∆Copeptin | Copeptin | 0.05 | -3.05 | .002** | -0.14 | [-0.24, -0.05] | -0.27 | [-0.45, -0.10] |
| ∆Copeptin | CV_event | 0.08 | -1.10 | .272 | -0.09 | [-0.24, 0.07] | -0.10 | [-0.27, 0.08] |
| ∆Copeptin | age | 0.03 | 2.53 | .011* | 0.07 | [0.02, 0.13] | 0.23 | [0.06, 0.40] |
| ∆Copeptin | sex | 0.07 | 1.32 | .186 | 0.10 | [-0.05, 0.24] | 0.13 | [-0.06, 0.31] |
| ∆Copeptin | BMI | 0.00 | 1.39 | .164 | 0.01 | [-0.00, 0.02] | 0.13 | [-0.05, 0.31] |
| Copeptin | CV_event | 0.15 | -0.71 | .477 | -0.11 | [-0.41, 0.19] | -0.06 | [-0.24, 0.11] |
| Copeptin | age | 0.06 | 1.36 | .173 | 0.08 | [-0.03, 0.18] | 0.12 | [-0.05, 0.30] |
| Copeptin | sex | 0.13 | -4.17 | < .001*** | -0.55 | [-0.81, -0.29] | -0.38 | [-0.54, -0.22] |
| Copeptin | BMI | 0.01 | 1.82 | .069 | 0.02 | [-0.00, 0.04] | 0.17 | [-0.01, 0.35] |

**Supplementary Table 4a**

**Supplementary Table 4a.** SEM results for T2D – Combined model for MR-proANP. Explained variance R2=0.05 for ∆MR-proANP and R2=0.37 for MR-proANP. *MR-proANP* refers to the natural log-transformed fasting peptide concentration. *∆MR-proANP* refers to the change in log-transformed concentrations (ln(postprandial) - ln(fasting)).

| **Outcome** | **Predictor** | **SE** | **Z** | **p** | **b** | **95% CI (b)** | **b*** | **95% CI (b*)** |
| --- | --- | --- | --- | --- | --- | --- | --- | --- |
| ∆MR-proANP | MR-proANP | 0.02 | -3.28 | .001** | -0.07 | [-0.12, -0.03] | -0.26 | [-0.41, -0.11] |
| ∆MR-proANP | diabetes | 0.03 | -0.00 | 1.00 | -0.00 | [-0.06, 0.06] | -0.00 | [-0.14, 0.14] |
| ∆MR-proANP | age | 0.01 | 1.34 | .181 | 0.02 | [-0.01, 0.04] | 0.11 | [-0.05, 0.27] |
| ∆MR-proANP | sex | 0.03 | 1.22 | .223 | 0.03 | [-0.02, 0.08] | 0.08 | [-0.05, 0.20] |
| ∆MR-proANP | BMI | 0.00 | -0.95 | .344 | -0.00 | [-0.01, 0.00] | -0.07 | [-0.20, 0.07] |
| MR-proANP | diabetes | 0.09 | -0.32 | .745 | -0.03 | [-0.20, 0.14] | -0.02 | [-0.13, 0.09] |
| MR-proANP | age | 0.03 | 11.64 | < .001*** | 0.32 | [0.26, 0.37] | 0.61 | [0.54, 0.69] |
| MR-proANP | sex | 0.07 | 0.69 | .490 | 0.05 | [-0.09, 0.19] | 0.04 | [-0.06, 0.14] |
| MR-proANP | BMI | 0.01 | 0.64 | .520 | 0.00 | [-0.01, 0.02] | 0.04 | [-0.07, 0.15] |

**Supplementary Table 4b**

**Supplementary Table 4b.** SEM results for T2D – Combined model for NT-proBNP. Explained variance R2=0.10 for ∆NT-proBNP and R2=0.26 for NT-proBNP. *NT-proBNP* refers to the natural log-transformed fasting peptide concentration. *∆NT-proBNP* refers to the change in log-transformed concentrations (ln(postprandial) - ln(fasting)).

| **Outcome** | **Predictor** | **SE** | **Z** | **p** | **b** | **95% CI (b)** | **b*** | **95% CI (b*)** |
| --- | --- | --- | --- | --- | --- | --- | --- | --- |
| ∆NT-proBNP | NT-proBNP | 0.01 | -2.58 | .010** | -0.02 | [-0.03, -0.00] | -0.18 | [-0.32, -0.05] |
| ∆NT-proBNP | diabetes | 0.02 | -0.73 | .464 | -0.02 | [-0.06, 0.03] | -0.05 | [-0.18, 0.08] |
| ∆NT-proBNP | age | 0.01 | 4.97 | < .001*** | 0.04 | [0.02, 0.05] | 0.36 | [0.22, 0.49] |
| ∆NT-proBNP | sex | 0.02 | -1.17 | .242 | -0.02 | [-0.06, 0.01] | -0.07 | [-0.19, 0.05] |
| ∆NT-proBNP | BMI | 0.00 | 0.49 | .627 | 0.00 | [-0.00, 0.00] | 0.03 | [-0.10, 0.16] |
| NT-proBNP | diabetes | 0.19 | 1.33 | .183 | 0.25 | [-0.12, 0.63] | 0.08 | [-0.04, 0.20] |
| NT-proBNP | age | 0.06 | 8.43 | < .001*** | 0.51 | [0.39, 0.63] | 0.48 | [0.39, 0.57] |
| NT-proBNP | sex | 0.16 | 1.86 | .063 | 0.30 | [-0.02, 0.61] | 0.10 | [-0.00, 0.21] |
| NT-proBNP | BMI | 0.02 | 0.67 | .503 | 0.01 | [-0.02, 0.04] | 0.04 | [-0.08, 0.16] |

**Supplementary Table 4c**

**Supplementary Table 4c.** SEM results for T2D – Combined model for Copeptin. Explained variance R2=0.13 for ∆Copeptin and R2=0.16 for Copeptin. *Copeptin* refers to the natural log-transformed fasting peptide concentration. *∆Copeptin* refers to the change in log-transformed concentrations (ln(postprandial) - ln(fasting)).

| **Outcome** | **Predictor** | **SE** | **Z** | **p** | **b** | **95% CI (b)** | **b*** | **95% CI (b*)** |
| --- | --- | --- | --- | --- | --- | --- | --- | --- |
| ∆Copeptin | Copeptin | 0.03 | -5.45 | < .001*** | -0.16 | [-0.22, -0.10] | -0.36 | [-0.48, -0.24] |
| ∆Copeptin | diabetes | 0.05 | 0.81 | .419 | 0.04 | [-0.06, 0.14] | 0.06 | [-0.08, 0.19] |
| ∆Copeptin | age | 0.02 | 0.71 | .476 | 0.01 | [-0.02, 0.04] | 0.05 | [-0.08, 0.17] |
| ∆Copeptin | sex | 0.04 | 0.43 | .671 | 0.02 | [-0.07, 0.10] | 0.03 | [-0.10, 0.15] |
| ∆Copeptin | BMI | 0.00 | 2.08 | .037* | 0.01 | [0.00, 0.02] | 0.14 | [0.01, 0.27] |
| Copeptin | diabetes | 0.11 | 1.04 | .296 | 0.12 | [-0.10, 0.33] | 0.07 | [-0.06, 0.20] |
| Copeptin | age | 0.04 | 2.65 | .008** | 0.09 | [0.02, 0.16] | 0.16 | [0.04, 0.28] |
| Copeptin | sex | 0.09 | -4.47 | < .001*** | -0.42 | [-0.60, -0.23] | -0.27 | [-0.38, -0.16] |
| Copeptin | BMI | 0.01 | 2.97 | .003** | 0.03 | [0.01, 0.05] | 0.20 | [0.07, 0.32] |

**Supplementary Table 4d**

**Supplementary Table 4d.** SEM results for T2D (sensitivity analysis with adjustment for AF and GFR) – Combined model for MR-proANP. Explained variance R2=0.04 for ∆MR-proANP and R2=0.53 for MR-proANP. *MR-proANP* refers to the natural log-transformed fasting peptide concentration. *∆MR-proANP* refers to the change in log-transformed concentrations (ln(postprandial) - ln(fasting)).

| **Outcome** | **Predictor** | **SE** | **Z** | **p** | **b** | **95% CI (b)** | **b*** | **95% CI (b*)** |
| --- | --- | --- | --- | --- | --- | --- | --- | --- |
| ∆MR-proANP | MR-proANP | 0.03 | -0.91 | .361 | -0.02 | [-0.07, 0.03] | -0.10 | [-0.31, 0.11] |
| ∆MR-proANP | diabetes | 0.03 | 0.02 | .983 | 0.00 | [-0.07, 0.07] | 0.00 | [-0.17, 0.17] |
| ∆MR-proANP | age | 0.01 | -1.34 | .179 | -0.02 | [-0.04, 0.01] | -0.14 | [-0.34, 0.06] |
| ∆MR-proANP | sex | 0.02 | 1.20 | .229 | 0.03 | [-0.02, 0.08] | 0.09 | [-0.06, 0.24] |
| ∆MR-proANP | BMI | 0.00 | -0.39 | .698 | -0.00 | [-0.01, 0.00] | -0.03 | [-0.20, 0.13] |
| ∆MR-proANP | GFR | 0.00 | -1.35 | .176 | -0.00 | [-0.00, 0.00] | -0.13 | [-0.32, 0.06] |
| ∆MR-proANP | AF | 0.03 | -0.44 | .661 | -0.01 | [-0.07, 0.05] | -0.04 | [-0.20, 0.13] |
| MR-proANP | diabetes | 0.10 | -0.08 | .939 | -0.01 | [-0.21, 0.19] | -0.00 | [-0.12, 0.11] |
| MR-proANP | age | 0.03 | 6.38 | < .001*** | 0.21 | [0.15, 0.28] | 0.42 | [0.30, 0.54] |
| MR-proANP | sex | 0.07 | 0.19 | .848 | 0.01 | [-0.13, 0.16] | 0.01 | [-0.09, 0.11] |
| MR-proANP | BMI | 0.01 | -0.57 | .569 | -0.00 | [-0.02, 0.01] | -0.03 | [-0.15, 0.08] |
| MR-proANP | GFR | 0.00 | -4.08 | < .001*** | -0.01 | [-0.01, -0.00] | -0.26 | [-0.39, -0.14] |
| MR-proANP | AF | 0.08 | -4.86 | < .001*** | -0.41 | [-0.57, -0.24] | -0.26 | [-0.37, -0.16] |

**Supplementary Table 4e**

**Supplementary Table 4e.** SEM results for T2D (sensitivity analysis with adjustment for AF and GFR) – Combined model for NT-proBNP. Explained variance R2=0.12 for ∆NT-proBNP and R2=0.55 for NT-proBNP. *NT-proBNP* refers to the natural log-transformed fasting peptide concentration. *∆NT-proBNP* refers to the change in log-transformed concentrations (ln(postprandial) - ln(fasting)).

| **Outcome** | **Predictor** | ***SE*** | ***Z*** | ***p*** | ***b*** | **95% CI (b)** | ***b**** | **95% CI (b*)** |
| --- | --- | --- | --- | --- | --- | --- | --- | --- |
| ∆NT-proBNP | NT-proBNP | 0.01 | -0.33 | .740 | -0.00 | [-0.02, 0.02] | -0.04 | [-0.24, 0.17] |
| ∆NT-proBNP | diabetes | 0.03 | 0.14 | .886 | 0.00 | [-0.05, 0.06] | 0.01 | [-0.15, 0.17] |
| ∆NT-proBNP | age | 0.01 | 3.88 | < .001*** | 0.04 | [0.02, 0.06] | 0.36 | [0.19, 0.54] |
| ∆NT-proBNP | sex | 0.02 | -1.44 | .149 | -0.03 | [-0.07, 0.01] | -0.11 | [-0.25, 0.04] |
| ∆NT-proBNP | BMI | 0.00 | 0.96 | .337 | 0.00 | [-0.00, 0.01] | 0.08 | [-0.08, 0.23] |
| ∆NT-proBNP | GFR | 0.00 | 1.85 | .064 | 0.00 | [-0.00, 0.00] | 0.17 | [-0.01, 0.35] |
| ∆NT-proBNP | AF | 0.03 | 1.90 | .058 | 0.05 | [-0.00, 0.10] | 0.17 | [-0.00, 0.34] |
| NT-proBNP | diabetes | 0.20 | 1.99 | .047* | 0.41 | [0.01, 0.81] | 0.12 | [0.00, 0.23] |
| NT-proBNP | age | 0.07 | 4.18 | < .001*** | 0.28 | [0.15, 0.42] | 0.27 | [0.14, 0.39] |
| NT-proBNP | sex | 0.15 | 2.43 | .015* | 0.36 | [0.07, 0.66] | 0.13 | [0.03, 0.23] |
| NT-proBNP | BMI | 0.02 | -0.97 | .330 | -0.02 | [-0.05, 0.02] | -0.06 | [-0.17, 0.06] |
| NT-proBNP | GFR | 0.00 | -3.41 | .001*** | -0.01 | [-0.02, -0.01] | -0.21 | [-0.34, -0.09] |
| NT-proBNP | AF | 0.17 | -8.23 | < .001*** | -1.40 | [-1.74, -1.07] | -0.44 | [-0.53, -0.34] |

**Supplementary Table 4f**

**Supplementary Table 4f.** SEM results for T2D (sensitivity analysis with adjustment for AF and GFR) – Combined model for Copeptin. Explained variance R2=0.21 for ∆Copeptin and R2=0.34 for Copeptin. *Copeptin* refers to the natural log-transformed fasting peptide concentration. *∆Copeptin* refers to the change in log-transformed concentrations (ln(postprandial) - ln(fasting)).

| **Outcome** | **Predictor** | **SE** | **Z** | **p** | **b** | **95% CI (b)** | **b*** | **95% CI (b*)** |
| --- | --- | --- | --- | --- | --- | --- | --- | --- |
| ∆Copeptin | Copeptin | 0.04 | -6.27 | < .001*** | -0.23 | [-0.30, -0.15] | -0.53 | [-0.68, -0.38] |
| ∆Copeptin | diabetes | 0.06 | 1.13 | .259 | 0.07 | [-0.05, 0.18] | 0.09 | [-0.07, 0.25] |
| ∆Copeptin | age | 0.02 | 0.65 | .515 | 0.01 | [-0.03, 0.05] | 0.06 | [-0.11, 0.23] |
| ∆Copeptin | sex | 0.05 | -1.10 | .273 | -0.05 | [-0.14, 0.04] | -0.08 | [-0.23, 0.07] |
| ∆Copeptin | BMI | 0.00 | 1.52 | .129 | 0.01 | [-0.00, 0.02] | 0.12 | [-0.03, 0.27] |
| ∆Copeptin | GFR | 0.00 | -0.98 | .329 | -0.00 | [-0.00, 0.00] | -0.09 | [-0.27, 0.09] |
| ∆Copeptin | AF | 0.05 | -0.51 | .609 | -0.02 | [-0.12, 0.07] | -0.04 | [-0.18, 0.10] |
| Copeptin | diabetes | 0.12 | 1.99 | .047* | 0.25 | [0.00, 0.49] | 0.14 | [0.00, 0.28] |
| Copeptin | age | 0.04 | -0.76 | .450 | -0.03 | [-0.11, 0.05] | -0.06 | [-0.22, 0.10] |
| Copeptin | sex | 0.09 | -5.67 | < .001*** | -0.52 | [-0.70, -0.34] | -0.36 | [-0.48, -0.25] |
| Copeptin | BMI | 0.01 | 1.66 | .096 | 0.02 | [-0.00, 0.04] | 0.12 | [-0.02, 0.25] |
| Copeptin | GFR | 0.00 | -5.50 | < .001*** | -0.01 | [-0.02, -0.01] | -0.43 | [-0.57, -0.29] |
| Copeptin | AF | 0.10 | -0.30 | .765 | -0.03 | [-0.24, 0.17] | -0.02 | [-0.15, 0.11] |

**Supplementary Table 5a**

**Supplementary Table 5a.** SEM results for T2D – Stroke Subanalysis for MR-proANP. Explained variance R2=0.04 for ∆MR-proANP and R2=0.39 for MR-proANP. *MR-proANP* refers to the natural log-transformed fasting peptide concentration. *∆MR-proANP* refers to the change in log-transformed concentrations (ln(postprandial) - ln(fasting)).

| **Outcome** | **Predictor** | **SE** | **Z** | **p** | **b** | **95% CI (b)** | **b*** | **95% CI (b*)** |
| --- | --- | --- | --- | --- | --- | --- | --- | --- |
| ∆MR-proANP | MR-proANP | 0.03 | -2.36 | .018* | -0.06 | [-0.12, -0.01] | -0.22 | [-0.41, -0.04] |
| ∆MR-proANP | diabetes | 0.04 | -0.00 | .999 | -0.00 | [-0.08, 0.08] | -0.00 | [-0.17, 0.17] |
| ∆MR-proANP | age | 0.01 | 0.84 | .399 | 0.01 | [-0.02, 0.04] | 0.08 | [-0.11, 0.27] |
| ∆MR-proANP | sex | 0.03 | 0.73 | .465 | 0.02 | [-0.04, 0.08] | 0.06 | [-0.09, 0.20] |
| ∆MR-proANP | BMI | 0.00 | -0.77 | .443 | -0.00 | [-0.01, 0.00] | -0.06 | [-0.23, 0.10] |
| MR-proANP | diabetes | 0.12 | 0.36 | .718 | 0.04 | [-0.19, 0.27] | 0.02 | [-0.11, 0.16] |
| MR-proANP | age | 0.03 | 9.87 | < .001*** | 0.31 | [0.25, 0.38] | 0.61 | [0.52, 0.70] |
| MR-proANP | sex | 0.08 | 0.86 | .392 | 0.07 | [-0.09, 0.24] | 0.05 | [-0.07, 0.17] |
| MR-proANP | BMI | 0.01 | -0.14 | .888 | -0.00 | [-0.02, 0.02] | -0.01 | [-0.14, 0.12] |

**Supplementary Table 5b**

**Supplementary Table 5b.** SEM results for T2D – Stroke Subanalysis for NT-proBNP. Explained variance R2=0.08 for ∆NT-proBNP and R2=0.33 for NT-proBNP. *NT-proBNP* refers to the natural log-transformed fasting peptide concentration. *∆NT-proBNP* refers to the change in log-transformed concentrations (ln(postprandial) - ln(fasting)).

| **Outcome** | **Predictor** | **SE** | **Z** | **p** | **b** | **95% CI (b)** | **b*** | **95% CI (b*)** |
| --- | --- | --- | --- | --- | --- | --- | --- | --- |
| ∆NT-proBNP | NT-proBNP | 0.01 | -2.05 | .041* | -0.02 | [-0.03, -0.00] | -0.18 | [-0.35, -0.01] |
| ∆NT-proBNP | diabetes | 0.03 | 0.22 | .829 | 0.01 | [-0.05, 0.06] | 0.02 | [-0.15, 0.18] |
| ∆NT-proBNP | age | 0.01 | 3.39 | .001*** | 0.03 | [0.01, 0.05] | 0.30 | [0.13, 0.46] |
| ∆NT-proBNP | sex | 0.02 | -1.35 | .178 | -0.03 | [-0.07, 0.01] | -0.10 | [-0.25, 0.04] |
| ∆NT-proBNP | BMI | 0.00 | 0.83 | .407 | 0.00 | [-0.00, 0.01] | 0.07 | [-0.09, 0.23] |
| NT-proBNP | diabetes | 0.25 | 1.90 | .057 | 0.47 | [-0.01, 0.96] | 0.13 | [-0.00, 0.27] |
| NT-proBNP | age | 0.07 | 7.84 | < .001*** | 0.53 | [0.40, 0.67] | 0.50 | [0.40, 0.61] |
| NT-proBNP | sex | 0.18 | 2.54 | .011* | 0.46 | [0.10, 0.81] | 0.16 | [0.04, 0.28] |
| NT-proBNP | BMI | 0.02 | -0.62 | .533 | -0.01 | [-0.05, 0.03] | -0.04 | [-0.18, 0.09] |

**Supplementary Table 5c**

**Supplementary Table 5c.** SEM results for T2D – Stroke Subanalysis for Copeptin. Explained variance R2=0.16 for ∆Copeptin and R2=0.22 for Copeptin. *Copeptin* refers to the natural log-transformed fasting peptide concentration. *∆Copeptin* refers to the change in log-transformed concentrations (ln(postprandial) - ln(fasting)).

| **Outcome** | **Predictor** | **SE** | **Z** | **p** | **b** | **95% CI (b)** | **b*** | **95% CI (b*)** |
| --- | --- | --- | --- | --- | --- | --- | --- | --- |
| ∆Copeptin | Copeptin | 0.04 | -5.43 | < .001*** | -0.20 | [-0.27, -0.13] | -0.43 | [-0.58, -0.29] |
| ∆Copeptin | diabetes | 0.07 | 1.12 | .261 | 0.07 | [-0.06, 0.20] | 0.09 | [-0.07, 0.25] |
| ∆Copeptin | age | 0.02 | 0.89 | .372 | 0.02 | [-0.02, 0.05] | 0.07 | [-0.08, 0.21] |
| ∆Copeptin | sex | 0.05 | -0.29 | .769 | -0.01 | [-0.11, 0.08] | -0.02 | [-0.17, 0.13] |
| ∆Copeptin | BMI | 0.01 | 1.68 | .094 | 0.01 | [-0.00, 0.02] | 0.13 | [-0.02, 0.29] |
| Copeptin | diabetes | 0.13 | 2.40 | .016* | 0.32 | [0.06, 0.59] | 0.19 | [0.04, 0.34] |
| Copeptin | age | 0.04 | 2.60 | .009** | 0.10 | [0.02, 0.17] | 0.18 | [0.05, 0.32] |
| Copeptin | sex | 0.10 | -4.52 | < .001*** | -0.45 | [-0.64, -0.25] | -0.31 | [-0.43, -0.18] |
| Copeptin | BMI | 0.01 | 1.69 | .091 | 0.02 | [-0.00, 0.04] | 0.13 | [-0.02, 0.28] |

**Supplementary Table 6a**

**Supplementary Table 6a.** SEM results for T2D – ACS Subanalysis for MR-proANP. Explained variance R2=0.09 for ∆MR-proANP and R2=0.37 for MR-proANP. *MR-proANP* refers to the natural log-transformed fasting peptide concentration. *∆MR-proANP* refers to the change in log-transformed concentrations (ln(postprandial) - ln(fasting)).

| **Outcome** | **Predictor** | **SE** | **Z** | **p** | **b** | **95% CI (b)** | **b*** | **95% CI (b*)** |
| --- | --- | --- | --- | --- | --- | --- | --- | --- |
| ∆MR-proANP | MR-proANP | 0.04 | -2.30 | .021* | -0.10 | [-0.19, -0.01] | -0.32 | [-0.59, -0.06] |
| ∆MR-proANP | diabetes | 0.05 | 0.03 | .978 | 0.00 | [-0.09, 0.09] | 0.00 | [-0.24, 0.25] |
| ∆MR-proANP | age | 0.02 | 1.18 | .237 | 0.03 | [-0.02, 0.08] | 0.18 | [-0.11, 0.47] |
| ∆MR-proANP | sex | 0.05 | 1.11 | .267 | 0.06 | [-0.04, 0.16] | 0.13 | [-0.10, 0.35] |
| ∆MR-proANP | BMI | 0.00 | -0.43 | .668 | -0.00 | [-0.01, 0.01] | -0.05 | [-0.30, 0.19] |
| MR-proANP | diabetes | 0.13 | -1.50 | .135 | -0.19 | [-0.43, 0.06] | -0.15 | [-0.35, 0.05] |
| MR-proANP | age | 0.05 | 6.44 | < .001*** | 0.33 | [0.23, 0.43] | 0.65 | [0.51, 0.79] |
| MR-proANP | sex | 0.14 | 0.12 | .908 | 0.02 | [-0.26, 0.29] | 0.01 | [-0.18, 0.20] |
| MR-proANP | BMI | 0.01 | 1.15 | .252 | 0.01 | [-0.01, 0.04] | 0.12 | [-0.08, 0.32] |

**Supplementary Table 6b**

**Supplementary Table 6b.** SEM results for T2D – ACS Subanalysis for NT-proBNP. Explained variance R2=0.19 for ∆NT-proBNP and R2=0.17 for NT-proBNP. *NT-proBNP* refers to the natural log-transformed fasting peptide concentration. *∆NT-proBNP* refers to the change in log-transformed concentrations (ln(postprandial) - ln(fasting)).

| **Outcome** | **Predictor** | **SE** | **Z** | **p** | **b** | **95% CI (b)** | **b*** | **95% CI (b*)** |
| --- | --- | --- | --- | --- | --- | --- | --- | --- |
| ∆NT-proBNP | NT-proBNP | 0.01 | -0.91 | .360 | -0.01 | [-0.04, 0.02] | -0.11 | [-0.33, 0.12] |
| ∆NT-proBNP | diabetes | 0.04 | -1.36 | .172 | -0.05 | [-0.12, 0.02] | -0.16 | [-0.38, 0.07] |
| ∆NT-proBNP | age | 0.02 | 3.63 | < .001*** | 0.06 | [0.03, 0.09] | 0.46 | [0.24, 0.68] |
| ∆NT-proBNP | sex | 0.04 | -0.01 | .991 | -0.00 | [-0.08, 0.08] | -0.00 | [-0.21, 0.21] |
| ∆NT-proBNP | BMI | 0.00 | -0.19 | .849 | -0.00 | [-0.01, 0.01] | -0.02 | [-0.25, 0.21] |
| NT-proBNP | diabetes | 0.28 | -0.88 | .379 | -0.25 | [-0.79, 0.30] | -0.10 | [-0.33, 0.12] |
| NT-proBNP | age | 0.11 | 3.90 | < .001*** | 0.45 | [0.22, 0.67] | 0.45 | [0.25, 0.65] |
| NT-proBNP | sex | 0.31 | -0.43 | .666 | -0.13 | [-0.75, 0.48] | -0.05 | [-0.26, 0.16] |
| NT-proBNP | BMI | 0.03 | 1.54 | .124 | 0.04 | [-0.01, 0.09] | 0.18 | [-0.04, 0.40] |

**Supplementary Table 6c**

**Supplementary Table 6c.** SEM results for T2D – ACS Subanalysis for Copeptin. Explained variance R2=0.09 for ∆Copeptin and R2=0.08 for Copeptin. *Copeptin* refers to the natural log-transformed fasting peptide concentration. *∆Copeptin* refers to the change in log-transformed concentrations (ln(postprandial) - ln(fasting)).

| **Outcome** | **Predictor** | **SE** | **Z** | **p** | **b** | **95% CI (b)** | **b*** | **95% CI (b*)** |
| --- | --- | --- | --- | --- | --- | --- | --- | --- |
| ∆Copeptin | Copeptin | 0.05 | -2.04 | .041* | -0.10 | [-0.19, -0.00] | -0.25 | [-0.48, -0.02] |
| ∆Copeptin | diabetes | 0.08 | 0.27 | .790 | 0.02 | [-0.13, 0.17] | 0.03 | [-0.22, 0.29] |
| ∆Copeptin | age | 0.03 | 0.16 | .873 | 0.01 | [-0.06, 0.07] | 0.02 | [-0.23, 0.27] |
| ∆Copeptin | sex | 0.09 | 1.13 | .259 | 0.10 | [-0.07, 0.27] | 0.14 | [-0.10, 0.37] |
| ∆Copeptin | BMI | 0.01 | 0.89 | .371 | 0.01 | [-0.01, 0.02] | 0.12 | [-0.14, 0.38] |
| Copeptin | diabetes | 0.20 | -1.00 | .317 | -0.20 | [-0.59, 0.19] | -0.13 | [-0.38, 0.12] |
| Copeptin | age | 0.08 | 0.84 | .400 | 0.07 | [-0.09, 0.24] | 0.11 | [-0.14, 0.35] |
| Copeptin | sex | 0.23 | -1.49 | .137 | -0.34 | [-0.78, 0.11] | -0.18 | [-0.41, 0.05] |
| Copeptin | BMI | 0.02 | 2.05 | .041* | 0.04 | [0.00, 0.08] | 0.26 | [0.02, 0.51] |

**Supplementary Table 7a**

**Supplementary Table 7a.** SEM results for HOMA-IR – Combined model for MR-proANP.Explained variance R2=0.07 for ∆MR-proANP and R2=0.39 for MR-proANP. *MR-proANP* refers to the natural log-transformed fasting peptide concentration. *∆MR-proANP* refers to the change in log-transformed concentrations (ln(postprandial) - ln(fasting)).

| **Outcome** | **Predictor** | **SE** | **Z** | **p** | **b** | **95% CI (b)** | **b*** | **95% CI (b*)** |
| --- | --- | --- | --- | --- | --- | --- | --- | --- |
| ∆MR-proANP | MR-proANP | 0.02 | -3.71 | < .001*** | -0.09 | [-0.13, -0.04] | -0.29 | [-0.44, -0.14] |
| ∆MR-proANP | HOMA-IR | 0.02 | -2.43 | .015* | -0.05 | [-0.09, -0.01] | -0.18 | [-0.33, -0.04] |
| ∆MR-proANP | age | 0.01 | 1.87 | .062 | 0.02 | [-0.00, 0.05] | 0.15 | [-0.01, 0.30] |
| ∆MR-proANP | sex | 0.03 | 1.05 | .294 | 0.03 | [-0.02, 0.08] | 0.07 | [-0.06, 0.19] |
| ∆MR-proANP | BMI | 0.00 | 0.48 | .632 | 0.00 | [-0.00, 0.01] | 0.04 | [-0.11, 0.18] |
| MR-proANP | HOMA-IR | 0.06 | -3.12 | .002** | -0.17 | [-0.28, -0.06] | -0.19 | [-0.30, -0.07] |
| MR-proANP | age | 0.03 | 12.50 | < .001*** | 0.32 | [0.27, 0.37] | 0.63 | [0.56, 0.70] |
| MR-proANP | sex | 0.07 | 0.57 | .569 | 0.04 | [-0.10, 0.18] | 0.03 | [-0.07, 0.13] |
| MR-proANP | BMI | 0.01 | 2.21 | .027* | 0.02 | [0.00, 0.03] | 0.13 | [0.02, 0.25] |

**Supplementary Table 7b**

**Supplementary Table 7b.** SEM results for HOMA-IR – Combined model for NT-proBNP.Explained variance R2=0.10 for ∆NT-proBNP and R2=0.27 for NT-proBNP. *NT-proBNP* refers to the natural log-transformed fasting peptide concentration. *∆NT-proBNP* refers to the change in log-transformed concentrations (ln(postprandial) - ln(fasting)).

| **Outcome** | **Predictor** | **SE** | **Z** | **p** | **b** | **95% CI (b)** | **b*** | **95% CI (b*)** |
| --- | --- | --- | --- | --- | --- | --- | --- | --- |
| ∆NT-proBNP | NT-proBNP | 0.01 | -2.83 | .005** | -0.02 | [-0.03, -0.01] | -0.20 | [-0.34, -0.06] |
| ∆NT-proBNP | HOMA-IR | 0.01 | -1.30 | .195 | -0.02 | [-0.05, 0.01] | -0.09 | [-0.24, 0.05] |
| ∆NT-proBNP | age | 0.01 | 5.07 | < .001*** | 0.04 | [0.02, 0.05] | 0.36 | [0.23, 0.49] |
| ∆NT-proBNP | sex | 0.02 | -1.15 | .250 | -0.02 | [-0.06, 0.01] | -0.07 | [-0.19, 0.05] |
| ∆NT-proBNP | BMI | 0.00 | 0.91 | .365 | 0.00 | [-0.00, 0.01] | 0.07 | [-0.08, 0.21] |
| NT-proBNP | HOMA-IR | 0.12 | -2.34 | .020* | -0.29 | [-0.53, -0.05] | -0.15 | [-0.28, -0.03] |
| NT-proBNP | age | 0.06 | 9.35 | < .001*** | 0.54 | [0.43, 0.65] | 0.51 | [0.43, 0.60] |
| NT-proBNP | sex | 0.16 | 1.57 | .116 | 0.25 | [-0.06, 0.56] | 0.09 | [-0.02, 0.19] |
| NT-proBNP | BMI | 0.02 | 2.42 | .016* | 0.04 | [0.01, 0.08] | 0.16 | [0.03, 0.28] |

**Supplementary Table 7c**

**Supplementary Table 7c.** SEM results for HOMA-IR – Combined model for Copeptin.R2=0.13 for ∆Copeptin and R2=0.16 for Copeptin. *Copeptin* refers to the natural log-transformed fasting peptide concentration. *∆Copeptin* refers to the change in log-transformed concentrations (ln(postprandial) - ln(fasting)).

| **Outcome** | **Predictor** | **SE** | **Z** | **p** | **b** | **95% CI (b)** | **b*** | **95% CI (b*)** |
| --- | --- | --- | --- | --- | --- | --- | --- | --- |
| ∆Copeptin | Copeptin | 0.03 | -5.42 | < .001*** | -0.16 | [-0.22, -0.10] | -0.36 | [-0.48, -0.24] |
| ∆Copeptin | HOMA-IR | 0.03 | 0.14 | .887 | 0.00 | [-0.06, 0.07] | 0.01 | [-0.13, 0.15] |
| ∆Copeptin | age | 0.02 | 0.93 | .353 | 0.01 | [-0.02, 0.05] | 0.06 | [-0.06, 0.18] |
| ∆Copeptin | sex | 0.04 | 0.30 | .768 | 0.01 | [-0.07, 0.10] | 0.02 | [-0.11, 0.14] |
| ∆Copeptin | BMI | 0.00 | 2.14 | .032* | 0.01 | [0.00, 0.02] | 0.16 | [0.02, 0.30] |
| Copeptin | HOMA-IR | 0.07 | 1.48 | .139 | 0.11 | [-0.04, 0.25] | 0.11 | [-0.03, 0.24] |
| Copeptin | age | 0.03 | 2.77 | .006** | 0.10 | [0.03, 0.16] | 0.17 | [0.05, 0.28] |
| Copeptin | sex | 0.09 | -4.58 | < .001*** | -0.42 | [-0.61, -0.24] | -0.27 | [-0.38, -0.16] |
| Copeptin | BMI | 0.01 | 2.33 | .020* | 0.02 | [0.00, 0.04] | 0.17 | [0.03, 0.30] |

**Supplementary Table 7d**

**Supplementary Table 7d.** SEM results for HOMA-IR (sensitivity analysis with adjustment for AF and GFR) – Combined model for MR-proANP. Explained variance R2=0.08 for ∆MR-proANP and R2=0.54 for MR-proANP. *MR-proANP* refers to the natural log-transformed fasting peptide concentration. *∆MR-proANP* refers to the change in log-transformed concentrations (ln(postprandial) - ln(fasting)).

| **Outcome** | **Predictor** | **SE** | **Z** | **p** | **b** | **95% CI (b)** | **b*** | **95% CI (b*)** |
| --- | --- | --- | --- | --- | --- | --- | --- | --- |
| ∆MR-proANP | MR-proANP | 0.02 | -3.09 | .002** | -0.07 | [-0.12, -0.03] | -0.28 | [-0.45, -0.11] |
| ∆MR-proANP | HOMA-IR | 0.02 | -2.90 | .004** | -0.05 | [-0.09, -0.02] | -0.22 | [-0.36, -0.07] |
| ∆MR-proANP | age | 0.01 | -0.12 | .901 | -0.00 | [-0.02, 0.02] | -0.01 | [-0.18, 0.16] |
| ∆MR-proANP | sex | 0.02 | 1.15 | .250 | 0.03 | [-0.02, 0.07] | 0.07 | [-0.05, 0.19] |
| ∆MR-proANP | BMI | 0.00 | 0.87 | .383 | 0.00 | [-0.00, 0.01] | 0.06 | [-0.08, 0.21] |
| ∆MR-proANP | GFR | 0.00 | -2.06 | .039* | -0.00 | [-0.00, -0.00] | -0.17 | [-0.33, -0.01] |
| ∆MR-proANP | AF | 0.03 | -1.37 | .172 | -0.04 | [-0.09, 0.02] | -0.09 | [-0.22, 0.04] |
| MR-proANP | HOMA-IR | 0.05 | -3.61 | < .001*** | -0.17 | [-0.27, -0.08] | -0.19 | [-0.29, -0.09] |
| MR-proANP | age | 0.03 | 7.59 | < .001*** | 0.21 | [0.16, 0.26] | 0.41 | [0.31, 0.51] |
| MR-proANP | sex | 0.06 | -0.57 | .568 | -0.04 | [-0.16, 0.09] | -0.03 | [-0.11, 0.06] |
| MR-proANP | BMI | 0.01 | 1.75 | .081 | 0.01 | [-0.00, 0.03] | 0.09 | [-0.01, 0.19] |
| MR-proANP | GFR | 0.00 | -5.56 | < .001*** | -0.01 | [-0.01, -0.01] | -0.30 | [-0.41, -0.20] |
| MR-proANP | AF | 0.07 | -5.07 | < .001*** | -0.35 | [-0.48, -0.21] | -0.23 | [-0.32, -0.14] |

**Supplementary Table 7e**

**Supplementary Table 7e.** SEM results for HOMA-IR (sensitivity analysis with adjustment for AF and GFR) – Combined model for NT-proBNP. Explained variance R2=0.11 for ∆NT-proBNP and R2=0.45 for NT-proBNP. *NT-proBNP* refers to the natural log-transformed fasting peptide concentration. *∆NT-proBNP* refers to the change in log-transformed concentrations (ln(postprandial) - ln(fasting)).

| **Outcome** | **Predictor** | ***SE*** | ***Z*** | ***p*** | ***b*** | **95% CI (b)** | ***b**** | **95% CI (b*)** |
| --- | --- | --- | --- | --- | --- | --- | --- | --- |
| ∆NT-proBNP | NT-proBNP | 0.01 | -1.64 | .101 | -0.01 | [-0.03, 0.00] | -0.13 | [-0.29, 0.03] |
| ∆NT-proBNP | HOMA-IR | 0.01 | -1.16 | .244 | -0.02 | [-0.04, 0.01] | -0.09 | [-0.23, 0.06] |
| ∆NT-proBNP | age | 0.01 | 4.92 | < .001*** | 0.04 | [0.03, 0.06] | 0.39 | [0.24, 0.53] |
| ∆NT-proBNP | sex | 0.02 | -1.09 | .276 | -0.02 | [-0.06, 0.02] | -0.07 | [-0.19, 0.05] |
| ∆NT-proBNP | BMI | 0.00 | 0.84 | .401 | 0.00 | [-0.00, 0.01] | 0.06 | [-0.08, 0.20] |
| ∆NT-proBNP | GFR | 0.00 | 0.71 | .480 | 0.00 | [-0.00, 0.00] | 0.05 | [-0.10, 0.21] |
| ∆NT-proBNP | AF | 0.02 | 1.60 | .109 | 0.04 | [-0.01, 0.08] | 0.11 | [-0.02, 0.25] |
| NT-proBNP | HOMA-IR | 0.11 | -2.56 | .010* | -0.28 | [-0.49, -0.07] | -0.15 | [-0.26, -0.04] |
| NT-proBNP | age | 0.06 | 4.98 | < .001*** | 0.31 | [0.19, 0.43] | 0.29 | [0.18, 0.41] |
| NT-proBNP | sex | 0.14 | 0.89 | .375 | 0.12 | [-0.15, 0.40] | 0.04 | [-0.05, 0.14] |
| NT-proBNP | BMI | 0.02 | 2.14 | .032* | 0.03 | [0.00, 0.06] | 0.12 | [0.01, 0.23] |
| NT-proBNP | GFR | 0.00 | -3.59 | < .001*** | -0.01 | [-0.02, -0.01] | -0.21 | [-0.33, -0.10] |
| NT-proBNP | AF | 0.16 | -7.65 | < .001*** | -1.19 | [-1.49, -0.88] | -0.38 | [-0.46, -0.29] |

**Supplementary Table 7f**

**Supplementary Table 7f.** SEM results for HOMA-IR (sensitivity analysis with adjustment for AF and GFR) – Combined model for Copeptin. Explained variance R2=0.15 for ∆Copeptin and R2=0.31 for Copeptin. *Copeptin* refers to the natural log-transformed fasting peptide concentration. *∆Copeptin* refers to the change in log-transformed concentrations (ln(postprandial) - ln(fasting)).

| **Outcome** | **Predictor** | ***SE*** | ***Z*** | ***p*** | ***b*** | **95% CI (b)** | ***b**** | **95% CI (b*)** |
| --- | --- | --- | --- | --- | --- | --- | --- | --- |
| ∆Copeptin | Copeptin | 0.03 | -5.80 | < .001*** | -0.17 | [-0.23, -0.11] | -0.42 | [-0.55, -0.29] |
| ∆Copeptin | HOMA-IR | 0.03 | 0.33 | .744 | 0.01 | [-0.05, 0.07] | 0.02 | [-0.12, 0.17] |
| ∆Copeptin | age | 0.02 | 0.78 | .438 | 0.01 | [-0.02, 0.05] | 0.06 | [-0.09, 0.21] |
| ∆Copeptin | sex | 0.04 | -0.21 | .834 | -0.01 | [-0.09, 0.07] | -0.01 | [-0.14, 0.12] |
| ∆Copeptin | BMI | 0.00 | 1.91 | .055 | 0.01 | [-0.00, 0.02] | 0.14 | [-0.00, 0.28] |
| ∆Copeptin | GFR | 0.00 | -0.58 | .559 | -0.00 | [-0.00, 0.00] | -0.05 | [-0.21, 0.11] |
| ∆Copeptin | AF | 0.04 | -0.08 | .940 | -0.00 | [-0.09, 0.08] | -0.00 | [-0.13, 0.12] |
| Copeptin | HOMA-IR | 0.07 | 1.39 | .166 | 0.09 | [-0.04, 0.23] | 0.09 | [-0.04, 0.22] |
| Copeptin | age | 0.04 | -1.53 | .126 | -0.06 | [-0.14, 0.02] | -0.10 | [-0.24, 0.03] |
| Copeptin | sex | 0.09 | -6.20 | < .001*** | -0.53 | [-0.70, -0.36] | -0.34 | [-0.44, -0.24] |
| Copeptin | BMI | 0.01 | 2.22 | .027* | 0.02 | [0.00, 0.04] | 0.14 | [0.02, 0.27] |
| Copeptin | GFR | 0.00 | -6.79 | < .001*** | -0.02 | [-0.02, -0.01] | -0.46 | [-0.59, -0.34] |
| Copeptin | AF | 0.09 | -0.51 | .611 | -0.05 | [-0.23, 0.14] | -0.03 | [-0.14, 0.08] |

**Supplementary Table 8a**

**Supplementary Table 8a.** SEM results for HOMA-IR – Stroke Subanalysis for MR-proANP. Explained variance R2=0.05 for ∆MR-proANP and R2=0.42 for MR-proANP. *MR-proANP* refers to the natural log-transformed fasting peptide concentration. *∆MR-proANP* refers to the change in log-transformed concentrations (ln(postprandial) - ln(fasting)).

| **Outcome** | **Predictor** | **SE** | **Z** | **p** | **b** | **95% CI (b)** | **b*** | **95% CI (b*)** |
| --- | --- | --- | --- | --- | --- | --- | --- | --- |
| ∆MR-proANP | MR-proANP | 0.03 | -2.66 | .008** | -0.07 | [-0.13, -0.02] | -0.26 | [-0.45, -0.07] |
| ∆MR-proANP | HOMA-IR | 0.03 | -1.58 | .113 | -0.04 | [-0.09, 0.01] | -0.15 | [-0.32, 0.03] |
| ∆MR-proANP | age | 0.01 | 1.29 | .196 | 0.02 | [-0.01, 0.05] | 0.13 | [-0.06, 0.32] |
| ∆MR-proANP | sex | 0.03 | 0.64 | .519 | 0.02 | [-0.04, 0.08] | 0.05 | [-0.10, 0.20] |
| ∆MR-proANP | BMI | 0.00 | 0.14 | .885 | 0.00 | [-0.01, 0.01] | 0.01 | [-0.16, 0.19] |
| MR-proANP | HOMA-IR | 0.07 | -3.25 | .001** | -0.22 | [-0.36, -0.09] | -0.23 | [-0.36, -0.09] |
| MR-proANP | age | 0.03 | 11.04 | < .001*** | 0.33 | [0.27, 0.39] | 0.65 | [0.57, 0.73] |
| MR-proANP | sex | 0.08 | 0.75 | .454 | 0.06 | [-0.10, 0.22] | 0.04 | [-0.07, 0.16] |
| MR-proANP | BMI | 0.01 | 1.80 | .072 | 0.02 | [-0.00, 0.04] | 0.12 | [-0.01, 0.26] |

**Supplementary Table 8b**

**Supplementary Table 8b.** SEM results for HOMA-IR – Stroke Subanalysis for NT-proBNP. Explained variance R2=0.08 for ∆NT-proBNP and R2=0.34 for NT-proBNP. *NT-proBNP* refers to the natural log-transformed fasting peptide concentration. *∆NT-proBNP* refers to the change in log-transformed concentrations (ln(postprandial) - ln(fasting)).

| **Outcome** | **Predictor** | **SE** | **Z** | **p** | **b** | **95% CI (b)** | **b*** | **95% CI (b*)** |
| --- | --- | --- | --- | --- | --- | --- | --- | --- |
| ∆NT-proBNP | NT-proBNP | 0.01 | -2.15 | .032* | -0.02 | [-0.04, -0.00] | -0.19 | [-0.37, -0.02] |
| ∆NT-proBNP | HOMA-IR | 0.02 | -0.73 | .468 | -0.01 | [-0.05, 0.02] | -0.06 | [-0.24, 0.11] |
| ∆NT-proBNP | age | 0.01 | 3.53 | < .001*** | 0.03 | [0.01, 0.05] | 0.32 | [0.15, 0.48] |
| ∆NT-proBNP | sex | 0.02 | -1.37 | .172 | -0.03 | [-0.07, 0.01] | -0.10 | [-0.25, 0.04] |
| ∆NT-proBNP | BMI | 0.00 | 1.27 | .205 | 0.00 | [-0.00, 0.01] | 0.11 | [-0.06, 0.28] |
| NT-proBNP | HOMA-IR | 0.15 | -2.31 | .021* | -0.35 | [-0.65, -0.05] | -0.17 | [-0.31, -0.03] |
| NT-proBNP | age | 0.07 | 8.88 | < .001*** | 0.59 | [0.46, 0.72] | 0.56 | [0.46, 0.66] |
| NT-proBNP | sex | 0.18 | 2.37 | .018* | 0.42 | [0.07, 0.78] | 0.15 | [0.03, 0.27] |
| NT-proBNP | BMI | 0.02 | 1.48 | .140 | 0.03 | [-0.01, 0.07] | 0.11 | [-0.03, 0.25] |

**Supplementary Table 8c**

**Supplementary Table 8c.** SEM results for HOMA-IR – Stroke Subanalysis for Copeptin. Explained variance R2=0.16 for ∆Copeptin and R2=0.20 for Copeptin. *Copeptin* refers to the natural log-transformed fasting peptide concentration. *∆Copeptin* refers to the change in log-transformed concentrations (ln(postprandial) - ln(fasting)).

| **Outcome** | **Predictor** | **SE** | **Z** | **p** | **b** | **95% CI (b)** | **b*** | **95% CI (b*)** |
| --- | --- | --- | --- | --- | --- | --- | --- | --- |
| ∆Copeptin | Copeptin | 0.04 | -5.30 | < .001*** | -0.19 | [-0.27, -0.12] | -0.42 | [-0.56, -0.28] |
| ∆Copeptin | HOMA-IR | 0.04 | -0.20 | .838 | -0.01 | [-0.09, 0.07] | -0.02 | [-0.18, 0.15] |
| ∆Copeptin | age | 0.02 | 1.20 | .232 | 0.02 | [-0.01, 0.06] | 0.09 | [-0.06, 0.23] |
| ∆Copeptin | sex | 0.05 | -0.37 | .710 | -0.02 | [-0.12, 0.08] | -0.03 | [-0.18, 0.12] |
| ∆Copeptin | BMI | 0.01 | 2.10 | .036* | 0.01 | [0.00, 0.02] | 0.18 | [0.01, 0.34] |
| Copeptin | HOMA-IR | 0.09 | 0.97 | .333 | 0.08 | [-0.08, 0.25] | 0.08 | [-0.08, 0.24] |
| Copeptin | age | 0.04 | 2.99 | .003** | 0.11 | [0.04, 0.19] | 0.21 | [0.08, 0.35] |
| Copeptin | sex | 0.10 | -4.63 | < .001*** | -0.47 | [-0.66, -0.27] | -0.32 | [-0.45, -0.20] |
| Copeptin | BMI | 0.01 | 2.04 | .041* | 0.02 | [0.00, 0.05] | 0.17 | [0.01, 0.32] |

**Supplementary Table 9a**

**Supplementary Table 9a.** SEM results for HOMA-IR – ACS Subanalysis for MR-proANP. Explained variance R2=0.13 for ∆MR-proANP and R2=0.37 for MR-proANP. *MR-proANP* refers to the natural log-transformed fasting peptide concentration. *∆MR-proANP* refers to the change in log-transformed concentrations (ln(postprandial) - ln(fasting)).

| **Outcome** | **Predictor** | **SE** | **Z** | **p** | **b** | **95% CI (b)** | **b*** | **95% CI (b*)** |
| --- | --- | --- | --- | --- | --- | --- | --- | --- |
| ∆MR-proANP | MR-proANP | 0.04 | -2.73 | .006** | -0.12 | [-0.20, -0.03] | -0.38 | [-0.63, -0.12] |
| ∆MR-proANP | HOMA-IR | 0.03 | -1.98 | .048* | -0.07 | [-0.14, -0.00] | -0.26 | [-0.52, -0.01] |
| ∆MR-proANP | age | 0.02 | 1.36 | .174 | 0.03 | [-0.01, 0.07] | 0.19 | [-0.08, 0.46] |
| ∆MR-proANP | sex | 0.05 | 1.00 | .319 | 0.05 | [-0.05, 0.15] | 0.11 | [-0.10, 0.32] |
| ∆MR-proANP | BMI | 0.00 | 0.67 | .506 | 0.00 | [-0.01, 0.01] | 0.09 | [-0.17, 0.35] |
| MR-proANP | HOMA-IR | 0.09 | -1.61 | .107 | -0.15 | [-0.33, 0.03] | -0.18 | [-0.39, 0.04] |
| MR-proANP | age | 0.05 | 6.11 | < .001*** | 0.30 | [0.20, 0.40] | 0.59 | [0.45, 0.74] |
| MR-proANP | sex | 0.14 | 0.29 | .772 | 0.04 | [-0.23, 0.31] | 0.03 | [-0.16, 0.21] |
| MR-proANP | BMI | 0.01 | 1.41 | .158 | 0.02 | [-0.01, 0.04] | 0.16 | [-0.06, 0.38] |

**Supplementary Table 9b**

**Supplementary Table 9b.** SEM results for HOMA-IR – ACS Subanalysis for NT-proBNP. Explained variance R2=0.17 for ∆NT-proBNP and R2=0.23 for NT-proBNP. *NT-proBNP* refers to the natural log-transformed fasting peptide concentration. *∆NT-proBNP* refers to the change in log-transformed concentrations (ln(postprandial) - ln(fasting)).

| **Outcome** | **Predictor** | **SE** | **Z** | **p** | **b** | **95% CI (b)** | **b*** | **95% CI (b*)** |
| --- | --- | --- | --- | --- | --- | --- | --- | --- |
| ∆NT-proBNP | NT-proBNP | 0.02 | -0.85 | .398 | -0.01 | [-0.04, 0.02] | -0.10 | [-0.34, 0.13] |
| ∆NT-proBNP | HOMA-IR | 0.03 | -0.38 | .708 | -0.01 | [-0.07, 0.04] | -0.05 | [-0.31, 0.21] |
| ∆NT-proBNP | age | 0.02 | 3.34 | .001*** | 0.05 | [0.02, 0.08] | 0.41 | [0.19, 0.62] |
| ∆NT-proBNP | sex | 0.04 | 0.22 | .824 | 0.01 | [-0.07, 0.09] | 0.02 | [-0.19, 0.23] |
| ∆NT-proBNP | BMI | 0.00 | -0.36 | .722 | -0.00 | [-0.01, 0.01] | -0.05 | [-0.31, 0.22] |
| NT-proBNP | HOMA-IR | 0.20 | -2.57 | .010* | -0.52 | [-0.91, -0.12] | -0.32 | [-0.55, -0.09] |
| NT-proBNP | age | 0.11 | 3.66 | < .001*** | 0.39 | [0.18, 0.60] | 0.39 | [0.20, 0.58] |
| NT-proBNP | sex | 0.30 | -0.51 | .607 | -0.15 | [-0.73, 0.43] | -0.05 | [-0.25, 0.15] |
| NT-proBNP | BMI | 0.03 | 2.53 | .012* | 0.07 | [0.02, 0.13] | 0.32 | [0.08, 0.55] |

**Supplementary Table 9c**

**Supplementary Table 9c.** SEM results for HOMA-IR – ACS Subanalysis for Copeptin. Explained variance R2=0.10 for ∆Copeptin and R2=0.08 for Copeptin. *Copeptin* refers to the natural log-transformed fasting peptide concentration. *∆Copeptin* refers to the change in log-transformed concentrations (ln(postprandial) - ln(fasting)).

| **Outcome** | **Predictor** | **SE** | **Z** | **p** | **b** | **95% CI (b)** | **b*** | **95% CI (b*)** |
| --- | --- | --- | --- | --- | --- | --- | --- | --- |
| ∆Copeptin | Copeptin | 0.05 | -2.12 | .034* | -0.10 | [-0.19, -0.01] | -0.26 | [-0.49, -0.03] |
| ∆Copeptin | HOMA-IR | 0.06 | 0.38 | .706 | 0.02 | [-0.09, 0.14] | 0.05 | [-0.22, 0.33] |
| ∆Copeptin | age | 0.03 | 0.26 | .796 | 0.01 | [-0.05, 0.07] | 0.03 | [-0.21, 0.27] |
| ∆Copeptin | sex | 0.09 | 1.12 | .263 | 0.10 | [-0.07, 0.27] | 0.13 | [-0.10, 0.36] |
| ∆Copeptin | BMI | 0.01 | 0.72 | .470 | 0.01 | [-0.01, 0.02] | 0.10 | [-0.18, 0.38] |
| Copeptin | HOMA-IR | 0.15 | 0.86 | .392 | 0.13 | [-0.17, 0.43] | 0.12 | [-0.15, 0.40] |
| Copeptin | age | 0.08 | 0.67 | .504 | 0.05 | [-0.11, 0.22] | 0.08 | [-0.16, 0.32] |
| Copeptin | sex | 0.22 | -1.23 | .219 | -0.27 | [-0.71, 0.16] | -0.15 | [-0.38, 0.08] |
| Copeptin | BMI | 0.02 | 1.07 | .285 | 0.02 | [-0.02, 0.06] | 0.15 | [-0.12, 0.43] |
